# Supplementary material for: Association of preserved ratio impaired spirometry with mortality: a systematic review and meta-analysis
Source: PubMed Central journal article supplement — Eur Respir Rev. 2023 Nov 1;32(170):230135. doi: 10.1183/16000617.0135-2023 (PMC10618908; doi:10.1183/16000617.0135-2023), 2023-11-01
Supplement: ERR-0135-2023.SUPPLEMENT.pdf [file ERR-0135-2023.SUPPLEMENT.pdf]

## **Supplementary Material**

### **Association of preserved ratio impaired spirometry with mortality: a systematic review and meta-analysis**

Shuyuan Yang<sup>1</sup>, Gengze Liao<sup>1</sup>, Lap Ah Tse<sup>1\*</sup>

1 Jockey Club School of Public Health and Primary Care, The Chinese University of Hong Kong, Hong Kong SAR

#### **\* Corresponding author:**

Lap Ah TSE, PhD

JC School of Public Health and Primary Care, Faculty of Medicine

The Chinese University of Hong Kong

Add: 4/F, JC School of Public Health and Primary Care, Prince of Wales Hospital, Shatin, New Territories, Hong Kong

Tel: 852-2252 8791; Fax: 852-2606 3500; E-mail: shelly@cuhk.edu.hk

## Search strategies

MEDLINE (via PubMed):

- #1 "preserved ratio impaired spirometry"
- #2 "restrictive spirometr\* pattern"[Title/Abstract]
- #3 "spirometr\* restriction"[Title/Abstract]
- #4 "restrictive ventilatory pattern"[Title/Abstract]
- #5 "restrictive pattern"[Title/Abstract]
- #6 "restrictive lung function pattern"[Title/Abstract]
- #7 "restrictive pulmonary function pattern"[Title/Abstract]
- #8 "restrictive lung disease"[Title/Abstract]
- #9 "restrictive pulmonary disease"[Title/Abstract]
- #10 "spirometr\* defect"[Title/Abstract]
- #11 "restrictive defect"[Title/Abstract]
- #12 "ventilatory defect"[Title/Abstract]
- #13 "spirometr\* impairment"[Title/Abstract]
- #14 "ventilatory impairment"[Title/Abstract]
- #15 "GOLD-unclassified"[Title/Abstract]
- #16 "GOLD-U"[Title/Abstract]
- #17 "unclassified pattern"[Title/Abstract]
- #18 "LLN-unclassified"[Title/Abstract]
- #19 "LLN-U"[Title/Abstract]
- #20 "non\*specific pattern"[Title/Abstract]
- #21 "abnormal spirometr\*"[Title/Abstract]
- #22 "spirometr\* abnormality"[Title/Abstract]
- #23 "impaired spirometr\*"[Title/Abstract]
- #24 mortality[MeSH Terms]
- #25 survival rate[MeSH Terms]
- #26 prognosis[MeSH Terms]
- #27 "mortality"[Title/Abstract]
- #28 "death"[Title/Abstract]
- #29 "fatal\*"[Title/Abstract]
- #30 "survival rate"[Title/Abstract]
- #31 "death rate"[Title/Abstract]
- #32 "prognosis"[Title/Abstract]
- #33 #1 or #2 or #3 or #4 or #5 or #6 or #7 or #8 or #9 or #10 or #11 or #12 or #13 or #14 or #15 or #16 or #17 or #18 or #19 or #20 or #21 or #22 or #23
- #34 #24 or #25 or #26 or #27 or #28 or #29 or #30 or #31 or #32
- #35 #33 and #34

*Embase (via Ovid):*

- #1 "preserved ratio impaired spirometry".mp.
- #2 "restrictive spirometr\* pattern".ab.ti.
- #3 "spirometr\* restriction".ab.ti.
- #4 "restrictive ventilatory pattern".ab.ti.
- #5 "restrictive pattern".ab.ti.
- #6 "restrictive lung function pattern".ab.ti.
- #7 "restrictive pulmonary function pattern".ab.ti.
- #8 "restrictive lung disease".ab.ti.
- #9 "restrictive pulmonary disease".ab.ti.
- #10 "spirometr\* defect".ab.ti.
- #11 "restrictive defect".ab.ti.
- #12 "ventilatory defect".ab.ti.
- #13 "spirometr\* impairment".ab.ti.
- #14 "ventilatory impairment".ab.ti.
- #15 "GOLD-unclassified".ab.ti.
- #16 "GOLD-U".ab.ti.
- #17 "unclassified pattern".ab.ti.
- #18 "LLN-unclassified".ab.ti.
- #19 "LLN-U".ab.ti.
- #20 "non\*specific pattern".ab.ti.
- #21 "abnormal spirometr\*".ab.ti.
- #22 "spirometr\* abnormality".ab.ti.
- #23 "impaired spirometr\*".ab.ti.
- #24 exp Mortality/
- #25 exp Survival Rate/
- #26 exp prognosis/
- #27 "mortality".ab.ti.
- #28 "death".ab.ti.
- #29 "fatal\*".ab.ti.
- #30 "survival rate".ab.ti.
- #31 "death rate".ab.ti.
- #32 "prognosis".ab.ti.
- #33 #1 or #2 or #3 or #4 or #5 or #6 or #7 or #8 or #9 or #10 or #11 or #12 or #13 or #14  
or #15 or #16 or #17 or #18 or #19 or #20 or #21 or #22 or #23
- #34 #24 or #25 or #26 or #27 or #28 or #29 or #30 or #31 or #32
- #35 #33 and #34

*Web of Science:*

- #1 TS=(preserved ratio impaired spirometry)
- #2 TS=(restrictive spirometr\* pattern)
- #3 TS=(spirometr\* restriction)
- #4 TS=( restrictive ventilatory pattern)
- #5 TS=(restrictive pattern)
- #6 TS=(restrictive lung function pattern)
- #7 TS=(restrictive pulmonary function pattern)
- #8 TS=(restrictive lung disease)
- #9 TS=(restrictive pulmonary disease)
- #10 TS=(spirometr\* defect)
- #11 TS=(restrictive defect)
- #12 TS=(ventilatory defect)
- #13 TS=(spirometr\* impairment)
- #14 TS=(ventilatory impairment)
- #15 TS=(GOLD-unclassified)
- #16 TS=(GOLD-U)
- #17 TS=(unclassified pattern)
- #18 TS=(LLN-unclassified)
- #19 TS=(LLN-U)
- #20 TS=(non\*specific pattern)
- #21 TS=(abnormal spirometr\*)
- #22 TS=(spirometr\* abnormality)
- #23 TS=(impaired spirometr\*)
- #24 TS=(mortality)
- #25 TS=(death)
- #26 TS=(fatal\*)
- #27 TS=(survival rate)
- #28 TS=(death rate)
- #29 TS=(prognosis)
- #30 #1 or #2 or #3 or #4 or #5 or #6 or #7 or #8 or #9 or #10 or #11 or #12 or #13 or #14  
or #15 or #16 or #17 or #18 or #19 or #20 or #21 or #22 or #23
- #31 #24 or #25 or #26 or #27 or #28 or #29
- #32 #30 and #31

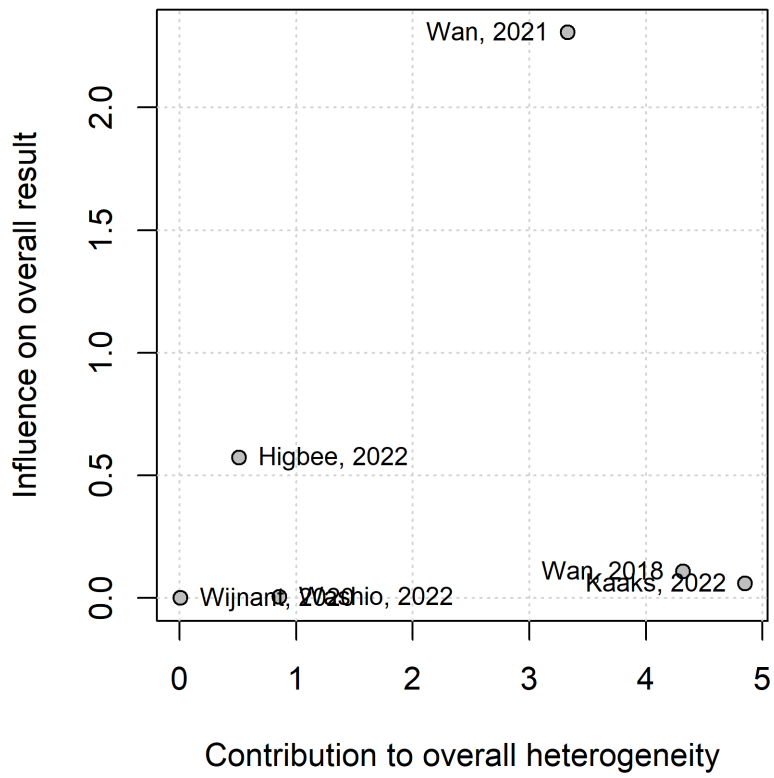

**Figure S1.** Baujat plot for the contribution of individual studies to overall heterogeneity

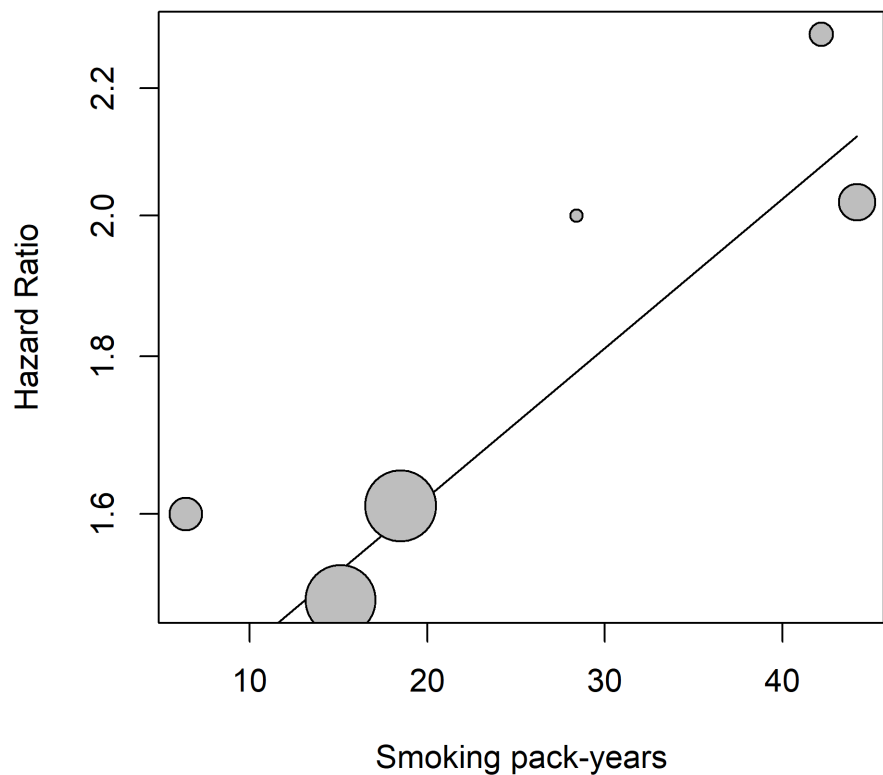

**Figure S2.** Meta-regression of hazard ratios for all-cause mortality in PRISm against smoking pack-years (mean or median as available)

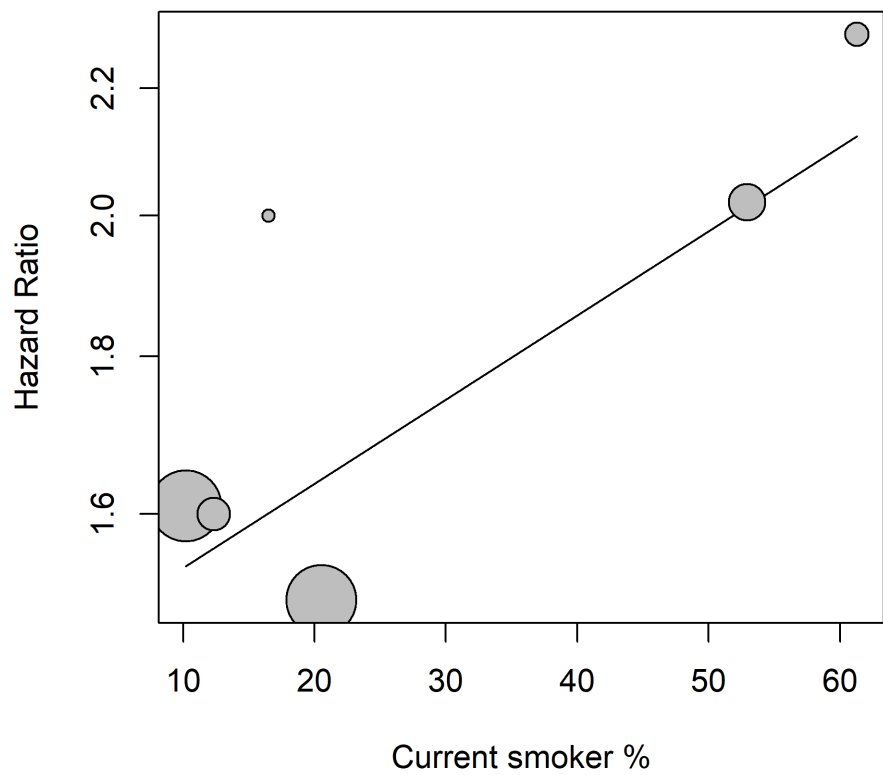

**Figure S3.** Meta-regression of hazard ratios for all-cause mortality in PRISm against percentage of current smoker (%)

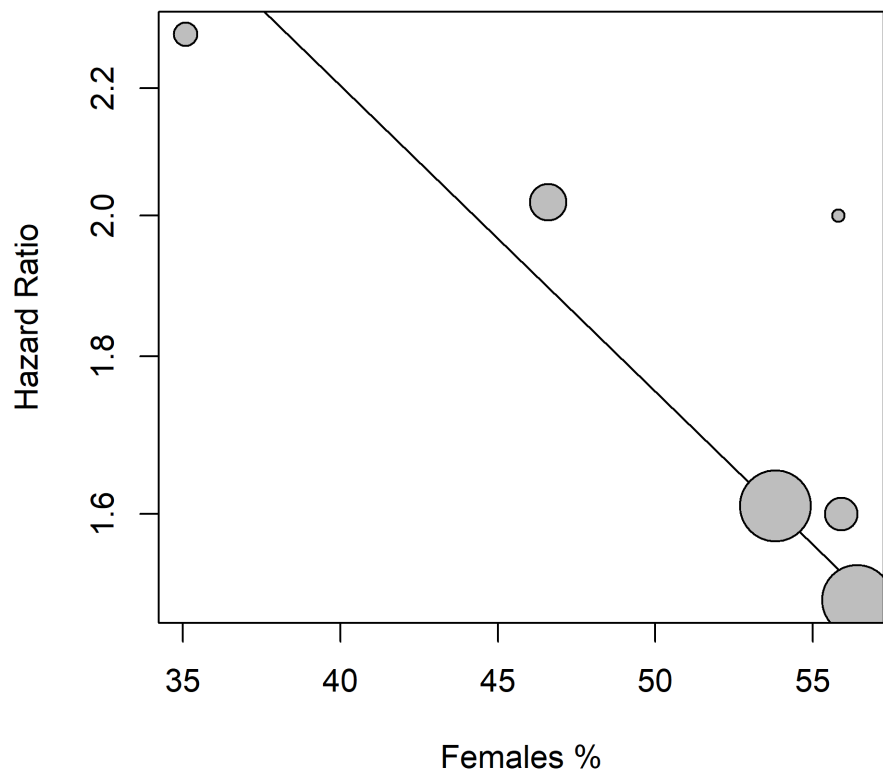

**Figure S4.** Meta-regression of hazard ratios for all-cause mortality in PRISM against percentage of female (%)



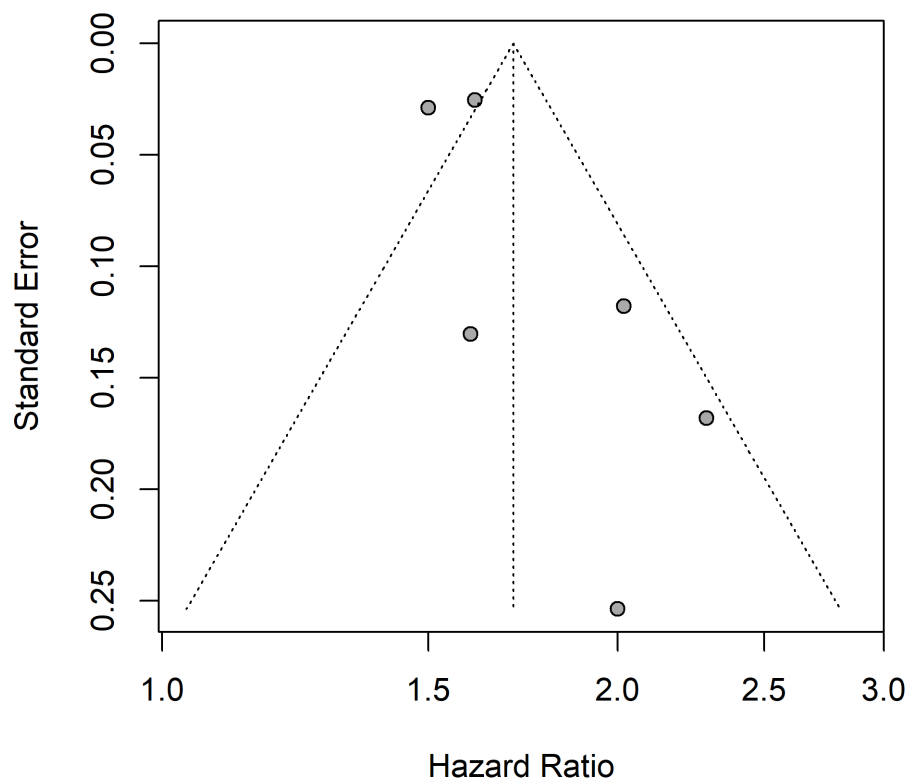

**Figure S5.** Funnel plots for meta-analyses of studies on all-cause mortality
